# Supplementary material for: A homochiral luminescent compound with four-fold symmetry as a potential chemosensor for nitroanilines
Source: Royal Society of Chemistry journal article supplement (doi:10.1039/c4ra08386e), 2014-01-01
Supplement: c4ra08386e1.pdf [file c4ra08386e1.pdf]

## **A homochiral luminescent compound with four-fold symmetry as a potential chemosensor for nitroanilines**

**Navnita Kumar<sup>a</sup>, Sadhika Khullar<sup>ab</sup> and Sanjay K. Mandal<sup>\*a</sup>**

<sup>a</sup>Department of Chemical Sciences, Indian Institute of Science Education and Research, Mohali, Sector 81, Manauli PO, S.A.S. Nagar, Mohali (Punjab) 140306, INDIA

<sup>b</sup>Department of Chemistry, DAV University, Jalandhar, Punjab 144001, INDIA

\*e-mail: sanjaymandal@iisermohali.ac.in

# **Supplementary Information**

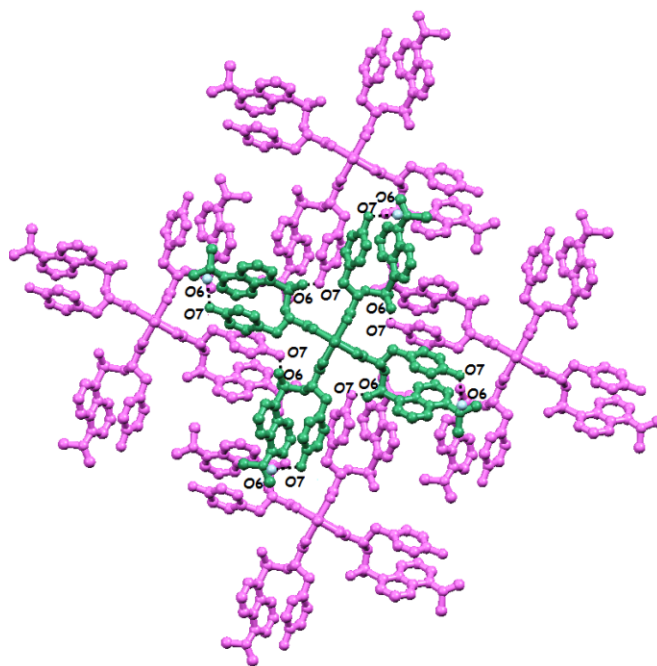

Fig. S1 Dinuclear subunit surrounded by four other dinuclear subunits.

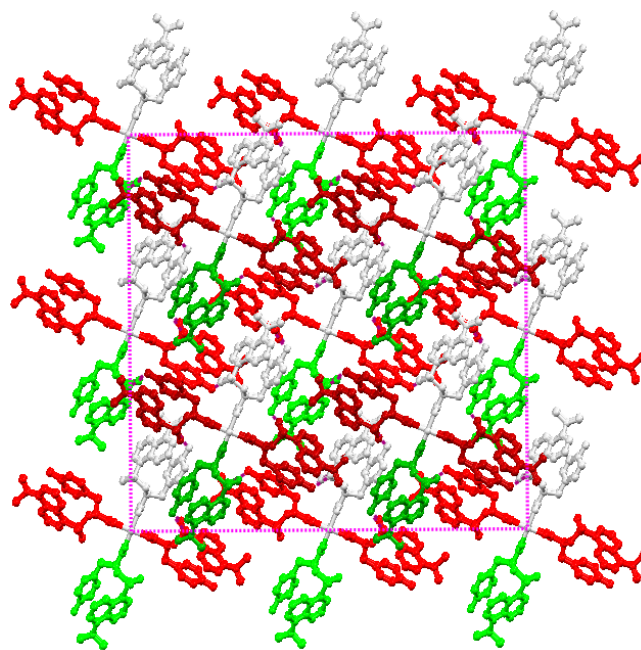

Fig. S2 Growth of the square synthon (different colors represent the symmetry operations).

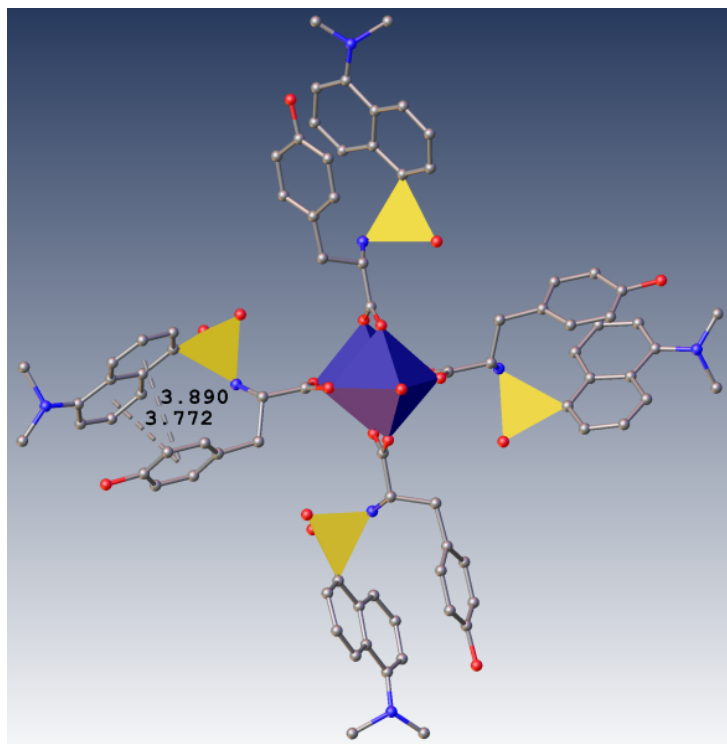

**Fig. S3** Schematic view showing  $\pi$ - $\pi$  interactions in **1**.

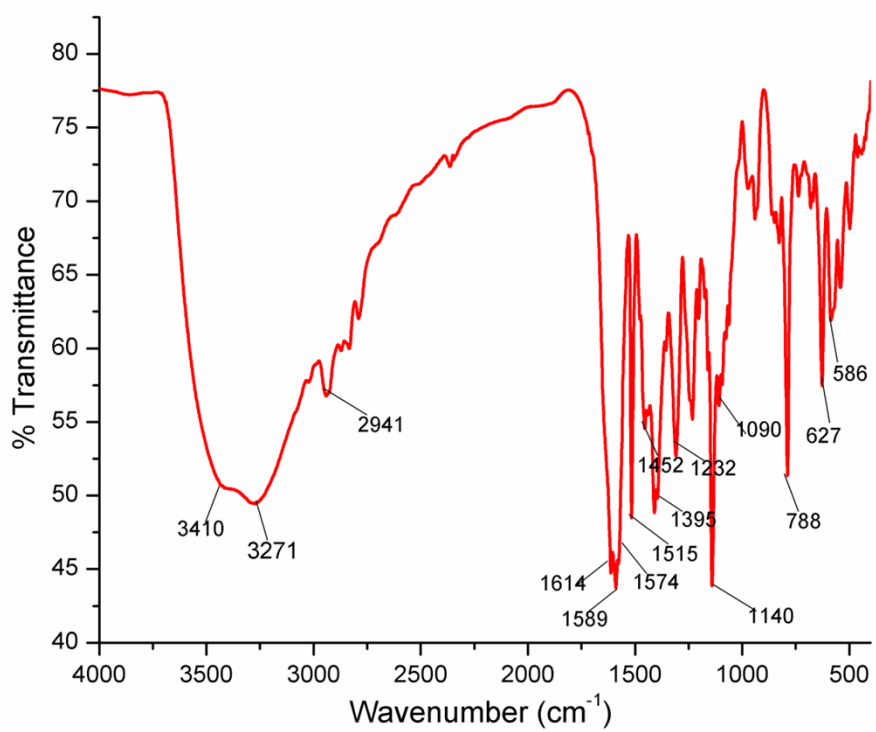

**Fig. S4** IR spectrum of **1**.

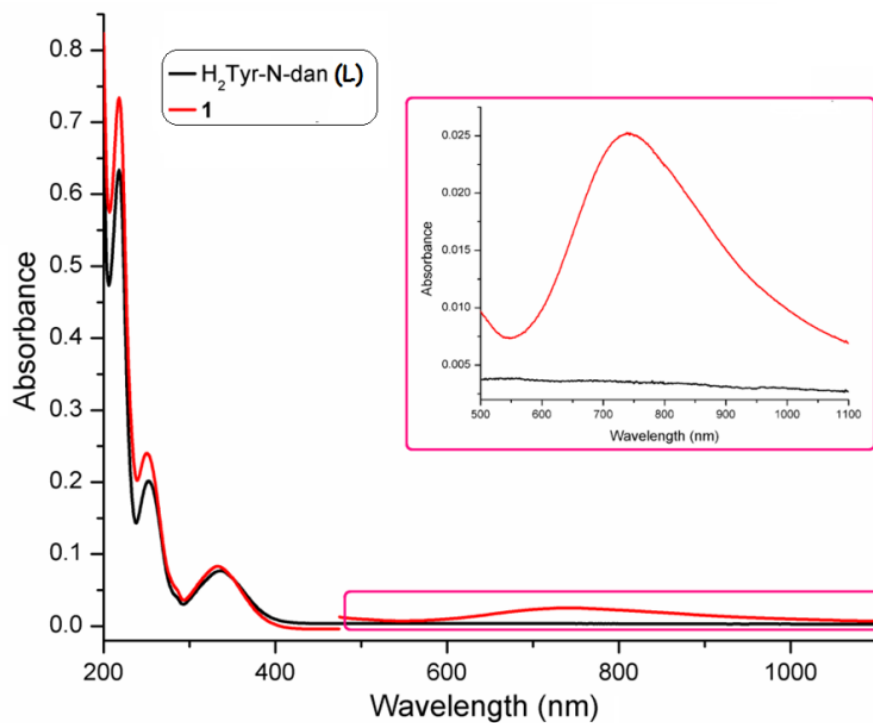

**Fig. S5** UV-Visible absorbance spectra of ligand and **1**. Inset: Absorbance in the visible region.

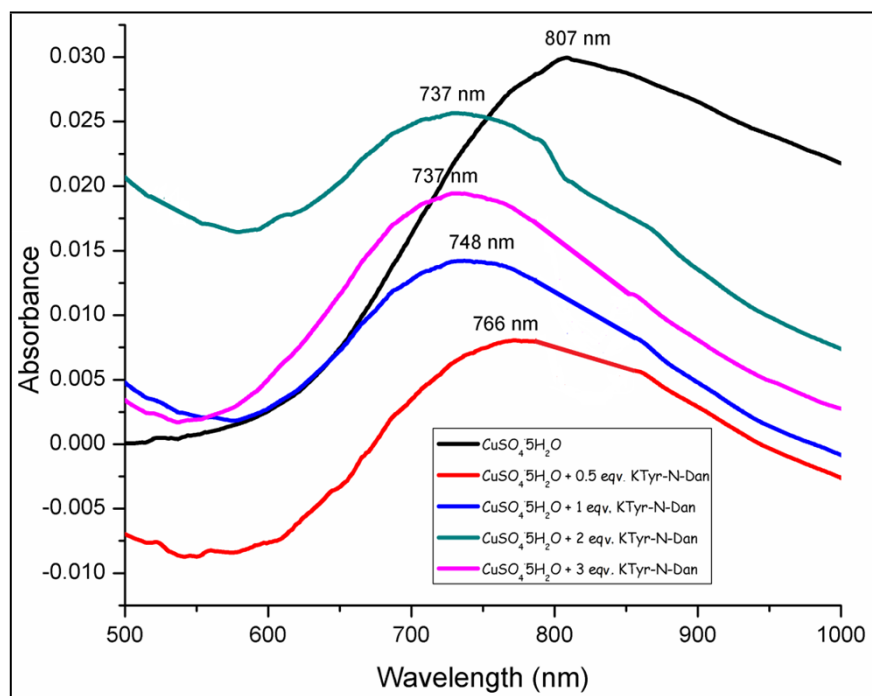

**Fig. S6** Monitoring the formation of **1** from  $\text{CuSO}_4 \cdot 5\text{H}_2\text{O}$  and KTyr-N-Dan in methanol by UV-Visible spectroscopy.

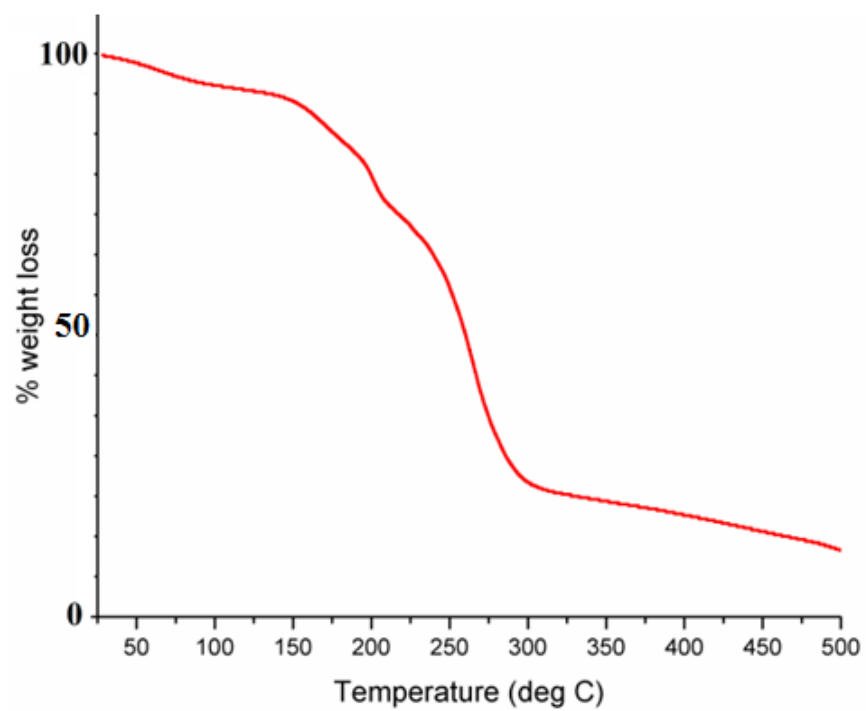

**Fig. S7** TGA scan for **1**.

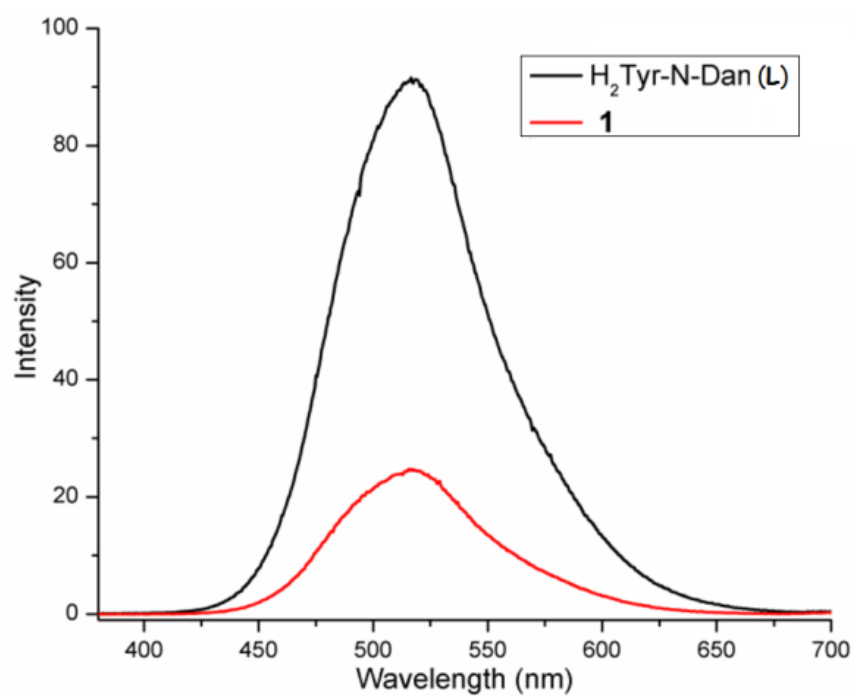

**Fig. S8** Photoluminescence spectra for H<sub>2</sub>Tyr-N-Dan and **1**.

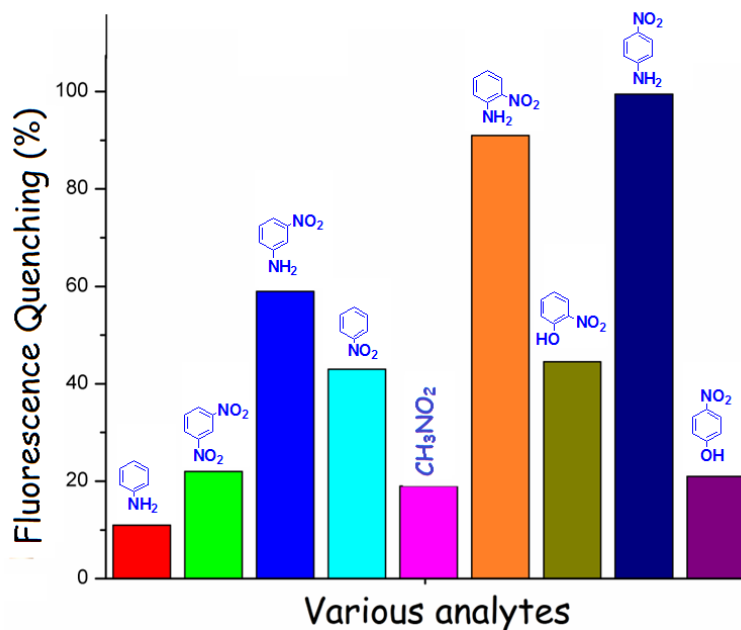

**Fig. S9** Comparative study of the role various analytes on quenching the fluorescence intensity of ligand in methanol .

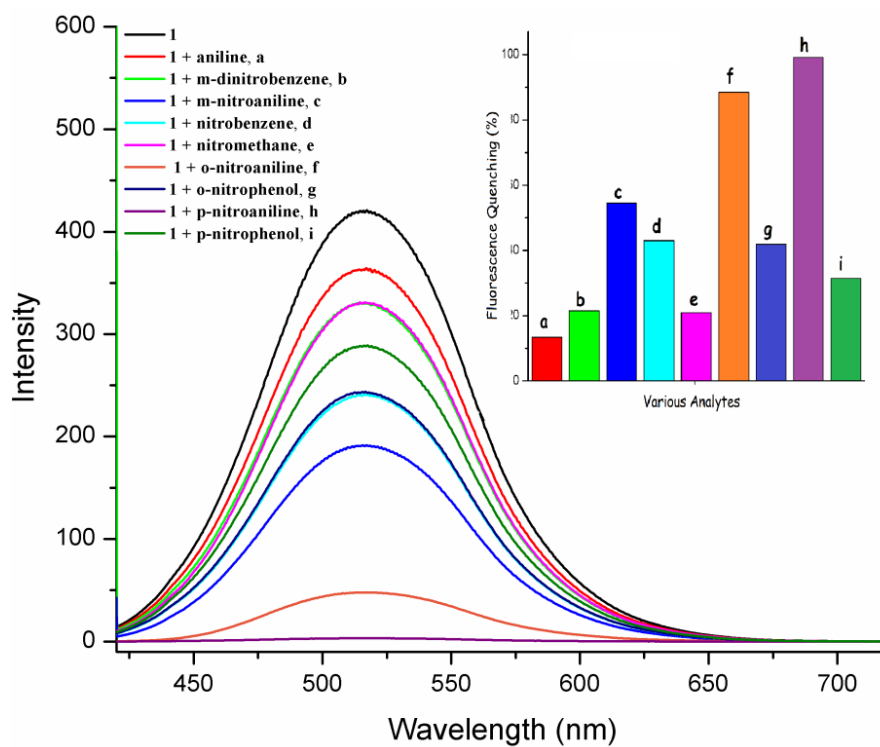

**Fig. S10** Change in Fluorescence intensity for complex 1 in methanol upon addition of various analytes.

**Table S1.** Selected bond lengths (Å) and bond angles (degrees) in **1**.

|                                        |            |                                        |            |
|----------------------------------------|------------|----------------------------------------|------------|
| Cu1-O4 <sup>#1</sup>                   | 1.949(4)   | Cu1-O4 <sup>#3</sup>                   | 1.949(4)   |
| Cu1-O4 <sup>#2</sup>                   | 1.949(4)   | Cu1-O4                                 | 1.949(4)   |
| Cu1-O1                                 | 2.130(10)  | Cu1-Cu2                                | 2.6384(14) |
| Cu2-O3 <sup>#1</sup>                   | 1.968(4)   | Cu2-O3 <sup>#2</sup>                   | 1.968(4)   |
| Cu2-O3 <sup>#3</sup>                   | 1.968(4)   | Cu2-O3                                 | 1.968(4)   |
| Cu2-O2                                 | 2.161(11)  |                                        |            |
|                                        |            |                                        |            |
| O4 <sup>#1</sup> -Cu1-O4 <sup>#3</sup> | 89.47(3)   | O4 <sup>#1</sup> -Cu1-O4 <sup>#2</sup> | 89.47(3)   |
| O4 <sup>#3</sup> -Cu1-O4 <sup>#2</sup> | 168.9(3)   | O4 <sup>#1</sup> -Cu1-O4               | 168.9(3)   |
| O4 <sup>#3</sup> -Cu1-O4               | 89.47(3)   | O4 <sup>#2</sup> -Cu1-O4               | 89.47(3)   |
| O4 <sup>#1</sup> -Cu1-O1               | 95.53(15)  | O4 <sup>#3</sup> -Cu1-O1               | 95.53(15)  |
| O4 <sup>#2</sup> -Cu1-O1               | 95.53(15)  | O4-Cu1-O1                              | 95.53(15)  |
| O4 <sup>#1</sup> -Cu1-Cu2              | 84.47(15)  | O4 <sup>#3</sup> -Cu1-Cu2              | 84.47(15)  |
| O4 <sup>#2</sup> -Cu1-Cu2              | 84.47(15)  | O4-Cu1-Cu2                             | 84.47(15)  |
| O1-Cu1-Cu2                             | 180.000(2) | O3 <sup>#1</sup> -Cu2-O3 <sup>#2</sup> | 89.33(3)   |
| O3 <sup>#1</sup> -Cu2-O3 <sup>#3</sup> | 89.33(3)   | O3 <sup>#2</sup> -Cu2-O3 <sup>#3</sup> | 167.6(3)   |
| O3 <sup>#1</sup> -Cu2-O3               | 167.6(3)   | O3 <sup>#2</sup> -Cu2-O3               | 89.33(3)   |
| O3 <sup>#3</sup> -Cu2-O3               | 89.33(3)   | O3 <sup>#1</sup> -Cu2-O2               | 96.21(13)  |
| O3 <sup>#2</sup> -Cu2-O2               | 96.21(13)  | O3 <sup>#3</sup> -Cu2-O2               | 96.21(13)  |
| O3-Cu2-O2                              | 96.21(13)  | O3 <sup>#1</sup> -Cu2-Cu1              | 83.79(13)  |
| O3 <sup>#2</sup> -Cu2-Cu1              | 83.79(13)  | O3 <sup>#3</sup> -Cu2-Cu1              | 83.79(13)  |
| O3-Cu2-Cu1                             | 83.79(13)  | O2-Cu2-Cu1                             | 180.000(2) |
| C1-O3-Cu2                              | 122.3(3)   | C1-O4-Cu1                              | 122.6(4)   |

Symmetry transformations used to generate equivalent atoms:

|    |               |
|----|---------------|
| #1 | -x+2, -y+2, z |
| #2 | x+2, -y, z    |
| #3 | -x, y+2, z    |
